# Supplementary material
Source: bioRxiv or medRxiv preprint supplement (https://www.biorxiv.org/highwire/filestream/4173/field_highwire_adjunct_files/0/016337-1.pdf)
Supplement: Supplementary file [file 016337-1.pdf]

Supplemental tables

Table S1: Human populations used in analyses, with the geographic locations that were used.

| Population                    | latitude | longitude |
|-------------------------------|----------|-----------|
| IDMT (Mentawai) <sup>1</sup>  | 0.3S     | 98.4E     |
| IDJV (Javanese) <sup>1</sup>  | 7.3S     | 110.4E    |
| IDSB (Kambera) <sup>1</sup>   | 9.8S     | 120.0E    |
| IDSO (Manggarai) <sup>1</sup> | 8.6S     | 120.1E    |
| IDRA (Manggarai) <sup>1</sup> | 8.7S     | 120.5E    |
| IDLA (Lamaholot) <sup>1</sup> | 8.3S     | 123.0E    |
| IDLE (Lembata) <sup>1</sup>   | 8.3S     | 124.6E    |
| IDAL (Alorese) <sup>1</sup>   | 8.3S     | 124.7E    |
| Papuan <sup>2</sup>           | 4.0S     | 143.0E    |
| Mongola <sup>3</sup>          | 48.0N    | 119.0E    |
| Hazara <sup>3</sup>           | 33.0N    | 69.5E     |
| Turkish <sup>3</sup>          | 39.0N    | 35.2E     |
| Uygur <sup>3</sup>            | 44.0N    | 81.0E     |
| Uzbekistani <sup>3</sup>      | 41.4N    | 64.6E     |
| Kashmiri Pandit <sup>4</sup>  | 34.22N   | 75.5E     |
| Pathan <sup>2</sup>           | 32.35N   | 69.72E    |
| Kshatriya <sup>5</sup>        | 27.56N   | 78.65E    |
| Kanjar <sup>5</sup>           | 26.45N   | 80.32E    |
| Brahmin (UP) <sup>5</sup>     | 26.02N   | 83.18E    |
| Brahmin <sup>4</sup>          | 25.45N   | 82.41E    |
| Kshatriya (UP) <sup>5</sup>   | 24.45N   | 82.41E    |
| Kshatriya <sup>4</sup>        | 27.56N   | 78.65E    |
| Dharkar <sup>5</sup>          | 25.44N   | 83.10E    |
| Chamar <sup>5</sup>           | 25.37N   | 83.04E    |
| Sindhi <sup>2</sup>           | 24.27N   | 68.70E    |
| Bhil <sup>4</sup>             | 23.02N   | 72.40E    |
| Madiga <sup>4</sup>           | 17.58N   | 79.35E    |
| Mala <sup>4</sup>             | 17.22N   | 78.29E    |
| Velama <sup>5</sup>           | 17.05N   | 79.27E    |
| Vysya <sup>4</sup>            | 14.41N   | 77.39E    |
| Kallar <sup>5</sup>           | 10.99N   | 78.22E    |

<sup>1</sup> THE HUGO PAN-ASIAN SNP CON-SORTIUM (2009);

<sup>2</sup> LI *et al.* (2008);

<sup>3</sup> HELLENTHAL *et al.* (2014);

<sup>4</sup> METSPALU and ROMERO (2011);

<sup>5</sup> MOORJANI *et al.* (2013)

Table S2: Estimated parameters, under the exponential model (Eq. 11) for the Indonesian populations used in our analysis (sum of squares fit). Here, each population has been fit independently

| Population | % Asian | Timing | Constant(Multiplicative) | Constant (Additive) | $\mathcal{L}$ |
|------------|---------|--------|--------------------------|---------------------|---------------|
| IDAL       | 44.4    | 29.1   | 3.01e-04                 | 2.47e-06            | 13732.60      |
| IDJV       | 99.8    | 665.2  | 2.68e-2                  | 5.80e-29            | 12138.46      |
| IDLA       | 61.6    | 60.9   | 7.85e-04                 | 2.016e-08           | 12505.03      |
| IDLE       | 58.6    | 40.7   | 5.18e-04                 | 6.22e-07            | 14097.24      |
| IDRA       | 77.5    | 106.0  | 1.45e-03                 | 2.80e-07            | 11188.83      |
| IDSB       | 78.7    | 94.9   | 1.22e-03                 | 8.16e-13            | 14042.64      |
| IDSO       | 66.7    | 33.5   | 4.57e-04                 | 5.81e-06            | 16442.91      |

Table S3: Estimated parameters, under the exponential model (Eq. 11) for the Central Asian populations used in our analysis (sum of squares fit). Here, each population has been fit independently

| Population | % Mongola | Timing (gens) | Constant (Mult.) | Constant (Add.) | $\mathcal{L}$ |
|------------|-----------|---------------|------------------|-----------------|---------------|
| Hazara     | 55.0      | 25            | 3.8e-04          | 1.7e-05         | 347.1         |
| Turkey     | 2.2       | 30            | 1.2e-04          | 1.8e-06         | 436.6         |
| Uygur      | 55.2      | 24            | 3.3e-04          | 2.3e-05         | 509.8         |
| Uzbekistan | 42.3      | 20            | 3.1e-04          | 2.8e-05         | 393.5         |

Figure S1: LD decay curves for populations of increasing distance  $L$  from zone and increasing age of contact zone. Solid lines represent analytic predictions and dotted lines represent the output of simulations *under the model* as described in the methods.

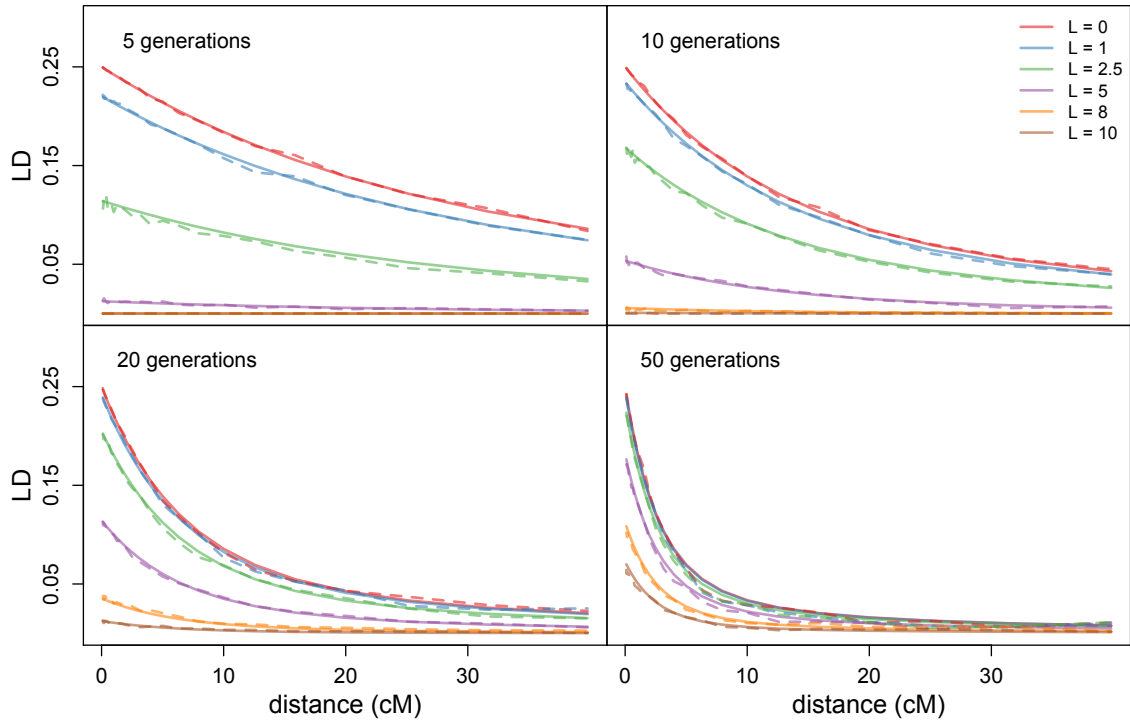

## Supplemental figures

Figure S2: Exponential fits (Eq. 11) to ancestry-LD in populations sampled at locations ( $L$ ) from a 50-generation old contact zone. Solid lines represent predicted LD under our contact zone model, and dashed lines the best exponential fit. The estimated timing for each population is shown in parentheses.

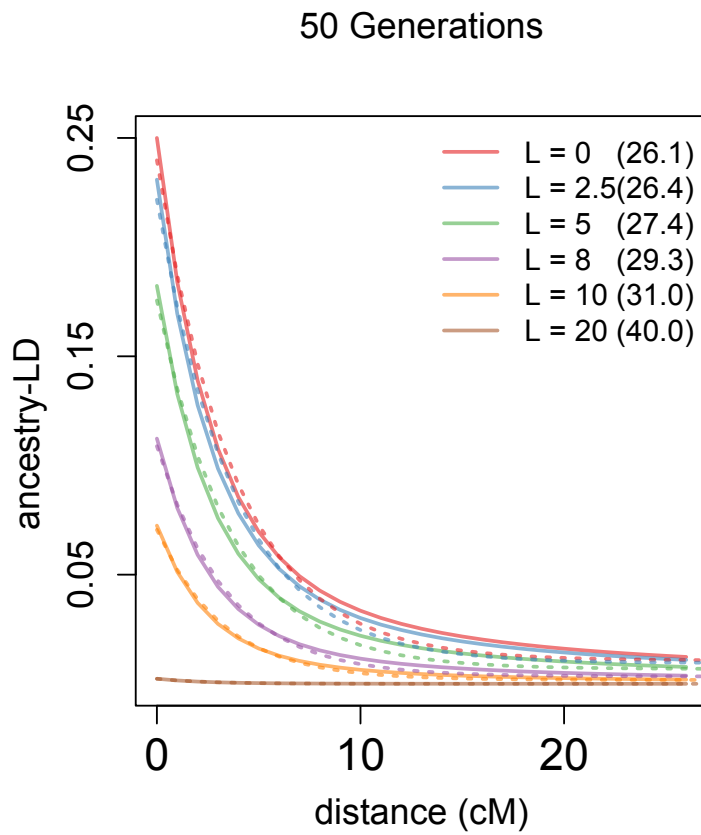

Figure S3: Fits to decay for all Indonesian populations used in analysis, described in Table S1 using the best fit parameters as described in the main text. Grey points are estimates generated by ALDER, and black curves are expected LD under the estimated parameters.

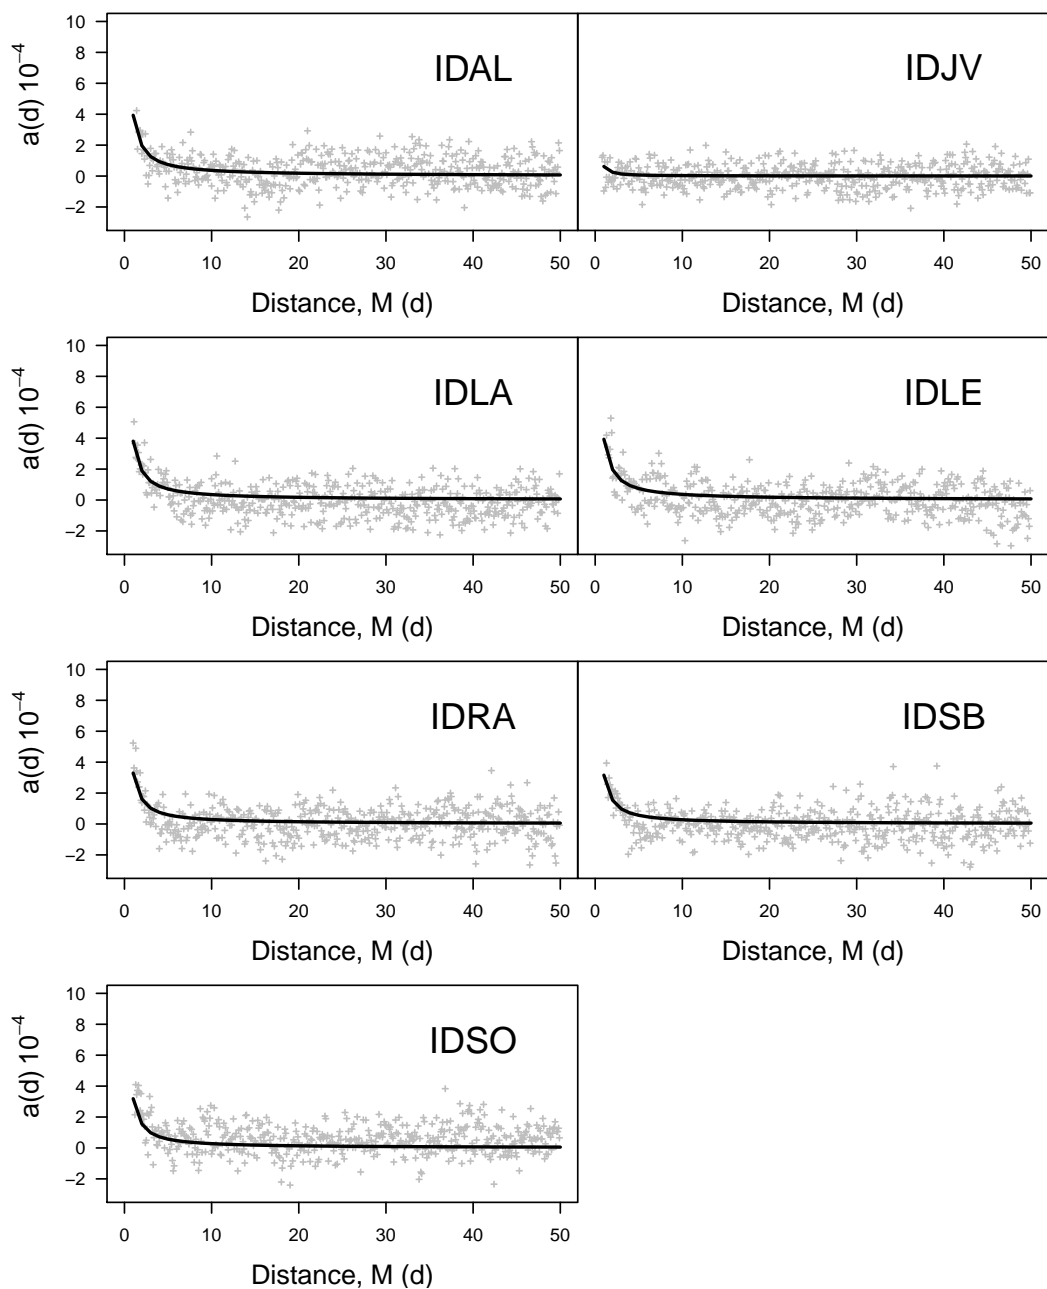

Figure S4: Fits to decay for all Indian populations used in analysis, described in Table S1 using the best fit parameters as described in the main text. Grey points are estimates generated by ALDER, and black curves are expected LD under the estimated parameters. Blue names indicate Indo-European populations, and red labels Dravidian.

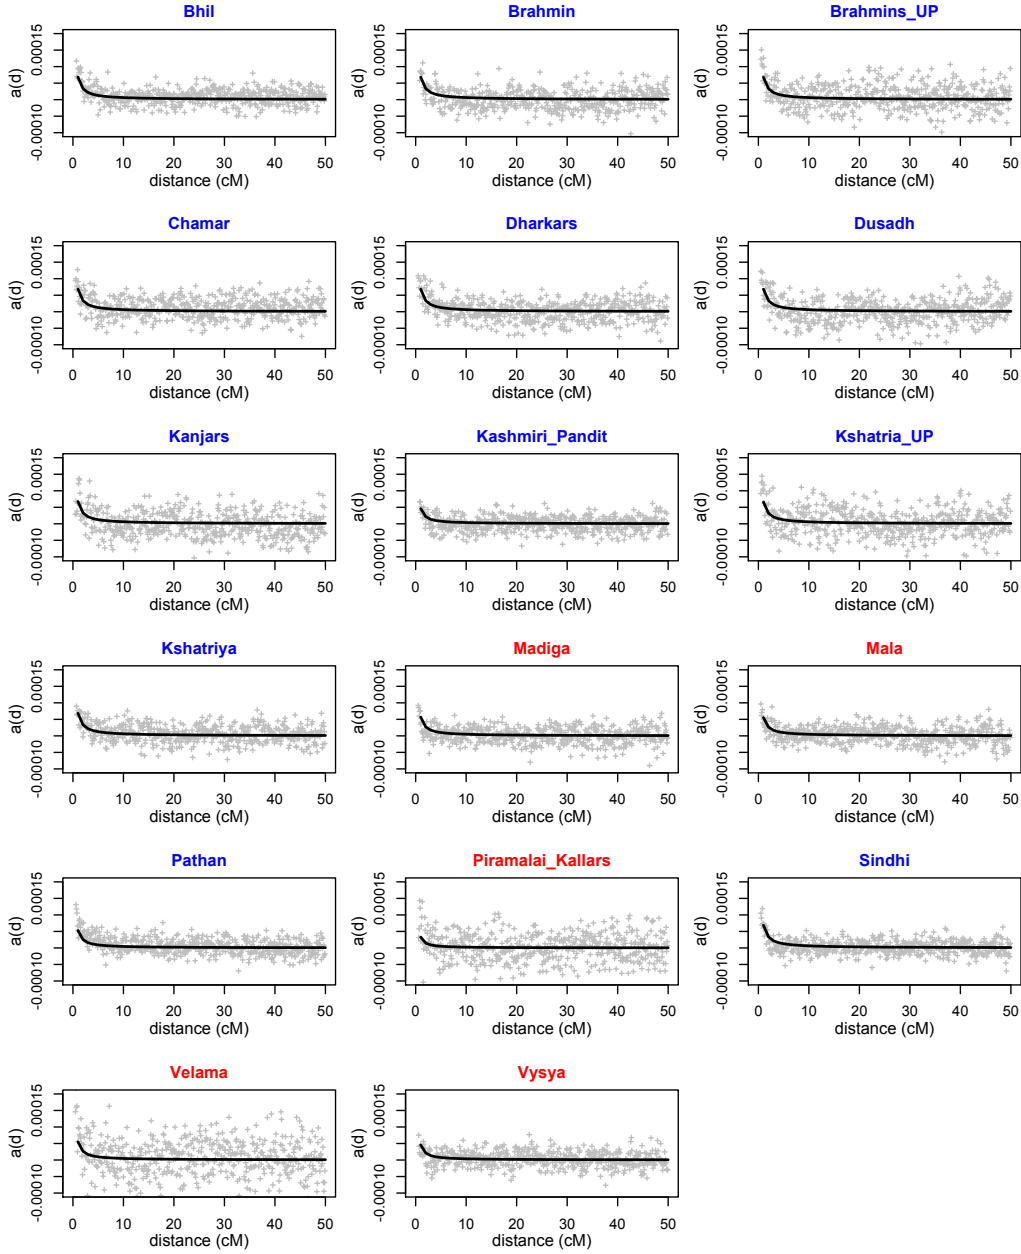

Figure S5: Profile likelihood surfaces for fits to the Indo-European and Dravidian subsets of the population. Blue asterisk indicates parameters giving best fit.

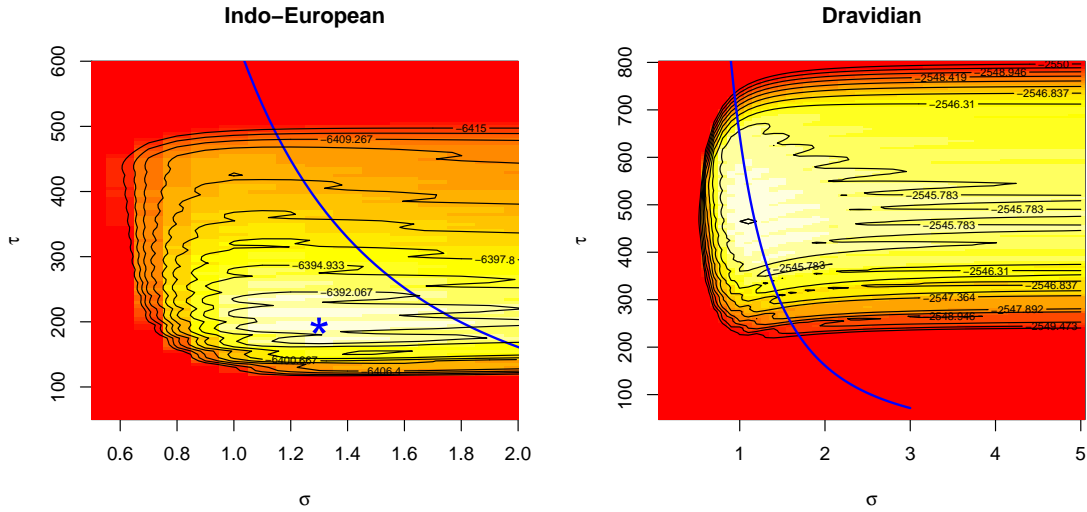

Figure S6: Best-fit curves for each population when fit is made to the set of three Asian populations used in our analysis (Hazara omitted). Grey points are estimates generated by ALDER, and black curves are expected LD under the estimated parameters.

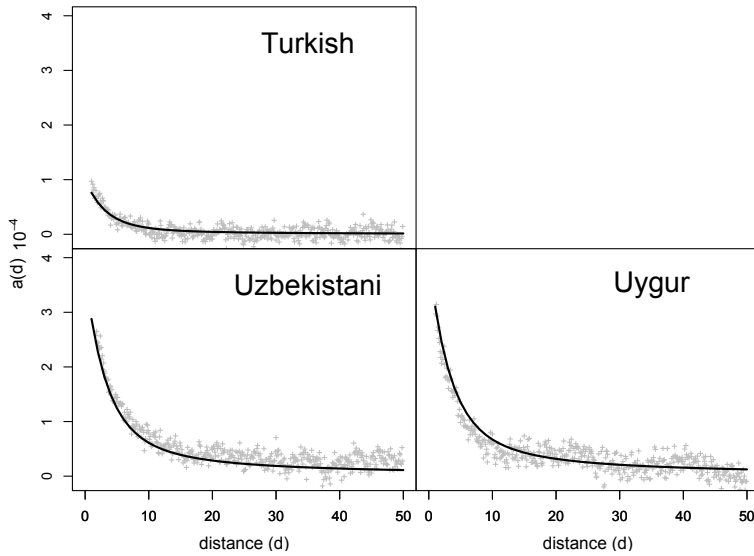



Figure S7: Best-fit curves for each population when the fit is made to the set of the four Central Asian populations used in our analysis. Grey points are estimates generated by ALDER, and black curves are expected LD under the estimated parameters.

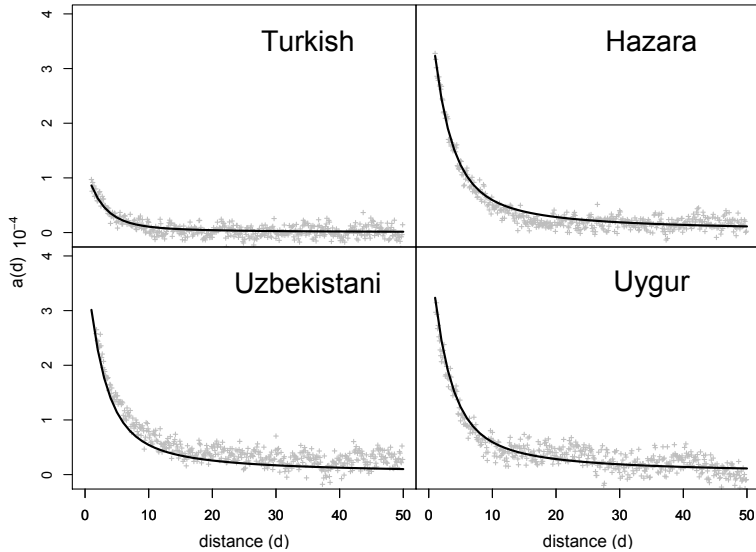

Figure S8: Profile likelihood curves for the five parameters fitted to the Central Asian populations under the invasion-pulse model, showing that the best fit is to a model with cline center at approximately  $67^\circ E$  and  $\Psi = 1$ . This is roughly equivalent to the original model of secondary contact.

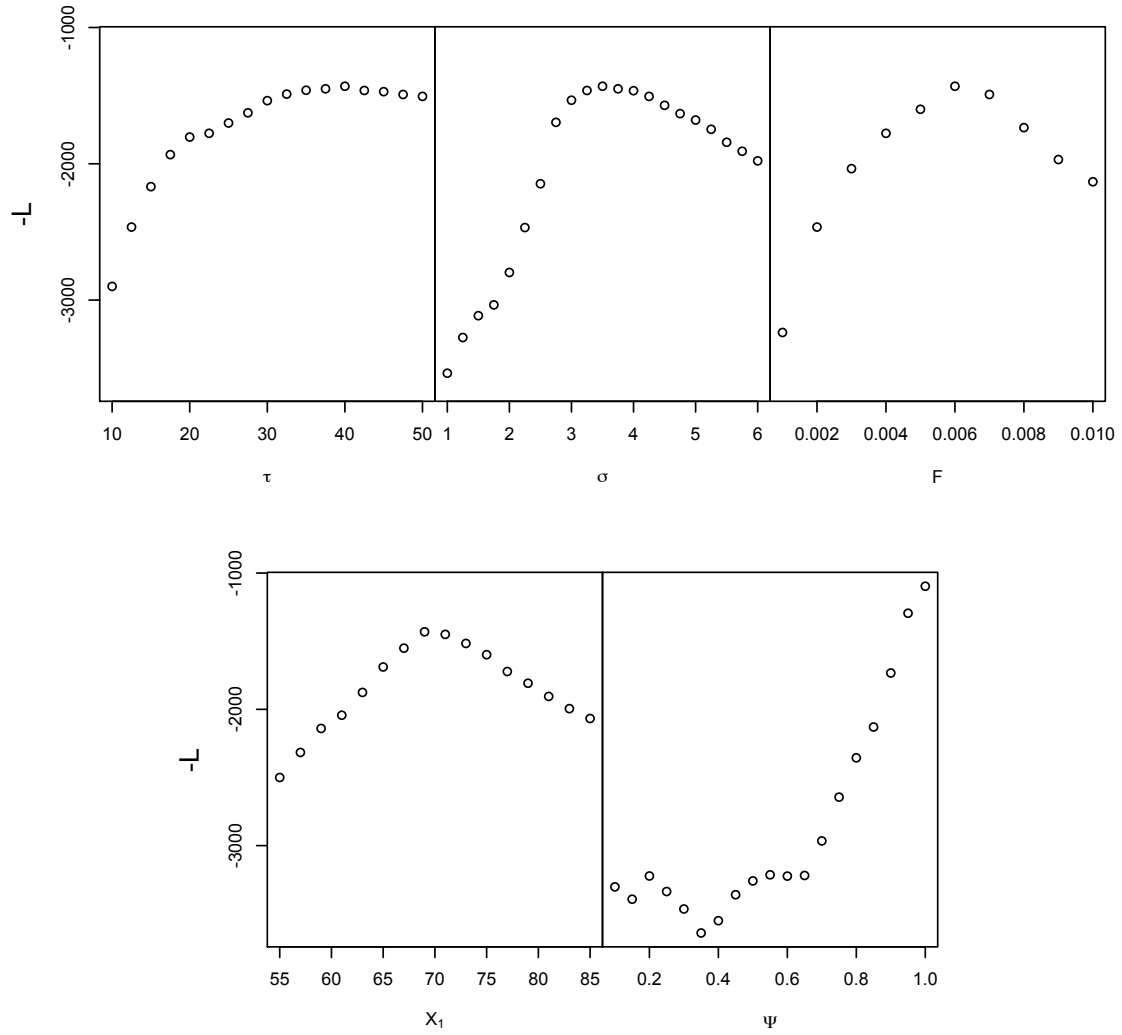

## References

- HELLENTHAL, G., G. B. J. BUSBY, G. BAND, J. F. WILSON, C. CAPELLI, D. FALUSH, and S. MYERS, 2014 A genetic atlas of human admixture history. *Science* **343**: 747–51.
- LI, R., Y. LI, K. KRISTIANSEN, and J. WANG, 2008 SOAP: short oligonucleotide alignment program. *Bioinformatics (Oxford, England)* **24**: 713–4.
- METSPALU, M., and I. ROMERO, 2011 Shared and unique components of human population structure and genome-wide signals of positive selection in South Asia. *The American Journal of . . .* : 731–744.
- MOORJANI, P., K. THANGARAJ, and N. PATTERSON, 2013 Genetic evidence for recent population mixture in India. *The American Journal of Human Genetics* : 422–438.
- THE HUGO PAN-ASIAN SNP CONSORTIUM, 2009 Mapping human genetic diversity in Asia. *Science (New York, N.Y.)* **326**: 1541–5.
